# Supplementary material for: Colonization by the Mycorrhizal Helper Bacillus pumilus HR10 Is Enhanced During the Establishment of Ectomycorrhizal Symbiosis Between Hymenochaete sp. Rl and Pinus thunbergii
Source: Front Microbiol. 2022 Mar 7;13:818912. doi: 10.3389/fmicb.2022.818912 (PMC8940532; doi:10.3389/fmicb.2022.818912)
Supplement: Supplementary file 1 [file Table_1.XLSX]

## Sheet: Fig. 1
HR10-Rhizosphere	8300	8100	4000	1900	2700	4400	10300	990	11500	5798.89	3000.89	0.0579889	0.0300089
HR10+Rl-Rhizosphere	35500	40100	76000	41900	54800	69600	122000	87800	104000	70188.9	21808.9	0.701889	0.218089
HR10-root surface	75000	95000	54000	23000	22000	33000	45000	38000	61000	49555.6	17355.6	0.495556	0.173556
HR10+Rl-root surface	328000	511000	509000	169000	182000	229000	263000	321000	351000	318111	85888.9	3.18111	0.858889

## Sheet: Fig. 2
	CK(thallus)				CK(spore)				Rl(thallus)				Rl(spore)				root(thallus)				root(spore)				Rl+root(thallus)				Rl+root(spore)
0h	25600	21200	23700	23500	17	21	26	21.3333	25600	21200	23700	23500	17	21	26	21.3333	25600	21200	23700	23500	17	21	26	21.3333	25600	21200	23700	23500	17	21	26	21.3333
6h	496000000	543000000	871000000	6.36667e+08	13	15	18	15.3333	435000000	748000000	534000000	5.72333e+08	13	9	5	9	1758000000	1280000000	1234000000	1424000000	37	21	66	41.3333	1864000000	1074000000	1519000000	1.48567e+09	14	14	18	15.3333
12h	3500000000	3820000000	7180000000	4.83333e+09	11	12	13	12	3000000000	6100000000	6380000000	5160000000	45	24	25	31.3333	5800000000	8200000000	14170000000	9390000000	16	16	29	20.3333	10150000000	14300000000	21570000000	15340000000	27	47	26	33.3333
18h	181700000000	2175000000000	193900000000	850200000000	23	26	34	27.6667	74600000000	64500000000	45700000000	61600000000	22	24	18	21.3333	267100000000	223300000000	288900000000	2.59767e+11	21	31	40	30.6667	236500000000	261000000000	324200000000	273900000000	42	42	103	62.3333
24h	4000000000	5000000000	4000000000	4.33333e+09	1890	3460	6100	3816.67	7000000000	7000000000	10000000000	8000000000	5450	4090	7630	5723.33	10000000000	8000000000	170000000000	6.26667e+10	10250	13750	14110	12703.3	22000000000	250000000000	20000000000	9.73333e+10	6700	5450	6400	6183.33
30h	2400000000	5400000000	7500000000	5100000000	5300	5980	1500	4260	460000000	910000000	1500000000	9.56667e+08	2890	5200	3340	3810	1530000000	3600000000	3800000000	2.97667e+09	17600	4720	25400	15906.7	2530000000	2400000000	18000000000	7.64333e+09	9500	4800	28890	14396.7
36h	3000000000	1800000000	700000000	1.83333e+09	27000	46000	54000	42333.3	1400000000	1400000000	6000000000	2.93333e+09	49000	30000	33000	37333.3	2500000000	300000000	593000000	1131000000	490000	93000	83000	222000	700000000	5000000000	700000000	2.13333e+09	497000	280000	169000	315333
42h	25000000000	57000000000	12000000000	3.13333e+10	474000	474000	474000	474000	1800000000	8000000000	53000000000	2.09333e+10	2809000	2809000	2809000	2809000	1700000000	9500000000	50600000000	20600000000	3192000	3686000	1474000	2784000	1400000000	2700000000	3100000000	2400000000	3640000	3640000	3640000	3640000
48h	4000000000	5000000000	4500000000	4500000000	5000	3000	4000	4000	12000000000	2000000000	7000000000	7000000000	6427	6427	6427	6427	34000000000	21000000000	30000000000	2.83333e+10	6000	5000	1000	4000	4000000000	20000000000	9000000000	11000000000	2000	6000	5000	4333.33
54h	37000000000	39000000000	31000000000	3.56667e+10	14000	4000	1000	6333.33	37000000000	34000000000	55000000000	42000000000	54000	54000	54000	54000	27000000000	40000000000	48000000000	3.83333e+10	38000	4000	8000	16666.7	38000000000	26000000000	71000000000	45000000000	364000	91000	46000	167000
60h	13080000000	13080000000	13080000000	13080000000	5220000	3420000	850000	3.16333e+06	4390000000	4390000000	4390000000	4390000000	4800000	1440000	850000	2.36333e+06	20060000000	20060000000	20060000000	20060000000	11310000	2840000	4800000	6.31667e+06	10630000000	10630000000	10630000000	10630000000	4700000	12030000	7000000	7910000
66h	13080000000	13080000000	13080000000	13080000000	480000000	730000000	1300000000	8.36667e+08	4390000000	4390000000	4390000000	4390000000	460000000	1180000000	320000000	6.53333e+08	20060000000	20060000000	20060000000	20060000000	2290000000	2300000000	1690000000	2.09333e+09	10630000000	10630000000	10630000000	10630000000	2210000000	1880000000	1380000000	1.82333e+09
72h	4100000000	5250000000	1870000000	3740000000	1530000000	970000000	1180000000	1.22667e+09	6070000000	3820000000	4120000000	4670000000	1920000000	3390000000	5880000000	3730000000	6980000000	56200000000	10380000000	24520000000	4340000000	3050000000	1700000000	3030000000	9350000000	77600000000	4690000000	3.05467e+10	1630000000	1580000000	1390000000	1.53333e+09
78h	11290000000	11540000000	12310000000	1.17133e+10	630000000	1600000000	240000000	8.23333e+08	8400000000	6490000000	7130000000	7340000000	1300000000	980000000	1250000000	1.17667e+09	7500000000	7370000000	8080000000	7650000000	3590000000	2020000000	1500000000	2370000000	14980000000	6390000000	7800000000	9.72333e+09	3200000000	1320000000	2310000000	2.27667e+09
84h	18600000000	18600000000	18600000000	18600000000	5030000000	5570000000	21600000000	1.07333e+10	23220000000	23220000000	23220000000	23220000000	4800000000	1670000000	3900000000	3.45667e+09	30080000000	30080000000	30080000000	30080000000	2780000000	1520000000	1020000000	1.77333e+09	18200000000	18200000000	18200000000	18200000000	960000000	1120000000	440000000	840000000
96h	15080000000	15330000000	15250000000	15220000000	6080000000	5720000000	5780000000	5860000000	21120000000	24570000000	22320000000	22670000000	2190000000	3280000000	1830000000	2.43333e+09	12540000000	13140000000	10540000000	1.20733e+10	5330000000	3890000000	2190000000	3.80333e+09	9720000000	7650000000	5980000000	7.78333e+09	1510000000	1720000000	5880000000	3.03667e+09
120h	920000000	1040000000	2640000000	1.53333e+09	205000000	128000000	233000000	1.88667e+08	2880000000	1860000000	1440000000	2060000000	267000000	176000000	116000000	1.86333e+08	2530000000	2730000000	1740000000	2.33333e+09	173000000	145000000	275000000	1.97667e+08	4280000000	3130000000	3060000000	3490000000	196000000	547000000	477000000	4.06667e+08

## Sheet: Fig. 3B
	CK1	CK2	CK3	Rl1	Rl2	Rl3	root1	root2	root3	Rl+root1	Rl+root2	Rl+root3
OD595	0.516	0.505	0.524	0.447	0.506	0.469	0.485	0.441	0.431	0.422	0.441	0.479
	0.595	0.589	0.575	0.476	0.499	0.47	0.466	0.478	0.462	0.42	0.445	0.487
	0.494	0.637	0.557	0.481	0.515	0.562	0.55	0.483	0.453	0.421	0.464	0.449
	0.535	0.577	0.552	0.468	0.506667	0.500333	0.500333	0.467333	0.448667	0.421	0.45	0.471667
OD490	0.292	0.446	0.34	0.397	0.351	0.405	0.365	0.332	0.359	0.304	0.312	0.354
	0.345	0.322	0.362	0.328	0.474	0.35	0.286	0.313	0.256	0.298	0.313	0.386
	0.32	0.337	0.313	0.284	0.314	0.267	0.327	0.308	0.287	0.295	0.359	0.457
	0.319	0.368333	0.338333	0.336333	0.379667	0.340667	0.326	0.317667	0.300667	0.299	0.328	0.399
OD750	0.434	0.513	0.485	0.455	0.469	0.462	0.458	0.466	0.473	0.33	0.525	0.545
	0.388	0.531	0.349	0.409	0.462	0.453	0.457	0.466	0.339	0.495	0.478	0.502
	0.249	0.506	0.461	0.46	0.459	0.467	0.426	0.378	0.427	0.486	0.496	0.511
	0.357	0.516667	0.431667	0.441333	0.463333	0.460667	0.447	0.436667	0.413	0.437	0.499667	0.519333
OD490/OD595	0.596262	0.638359	0.612923	0.718661	0.749342	0.680879	0.651566	0.679743	0.670134	0.710214	0.728889	0.845936
OD750/OD595	0.66729	0.895436	0.782005	0.94302	0.914474	0.92072	0.893404	0.934379	0.920505	1.038	1.11037	1.10106
	OD490/OD595			OD490/OD595			OD750/OD595			OD750/OD595
CK	0.596262	0.638359	0.612923	0.615848	0.0112557		0.66729	0.895436	0.782005	0.781577	0.0571436
Rl	0.718661	0.749342	0.680879	0.716294	0.0177074		0.94302	0.914474	0.92072	0.926071	0.00847445
root	0.651566	0.679743	0.670134	0.667148	0.00779095		0.893404	0.934379	0.920505	0.916096	0.011346
Rl+root	0.710214	0.728889	0.845936	0.76168	0.0421284		1.038	1.11037	1.10106	1.08315	0.0225702

## Sheet: Fig. 3C
													Absorbance(570nm)
CK	2.226	2.293	2.202	2.367	2.175	2.165	2.483	2.095	2.171	2.412	2.204	2.207	2.25	0.0853846
Rl	2.448	2.269	2.43	2.592	2.449	2.35	2.554	2.26	2.365	2.526	2.302	2.484	2.41908	0.0845256
Root	2.627	2.56	2.604	2.898	2.694	2.639	2.613	2.569	2.601	2.644	2.512	2.654	2.63458	0.0547821
Rl+root	2.146	2.183	2.232	2.265	2.073	2.067	2.263	2.075	2.124	2.317	2.102	2.135	2.16517	0.0667949

## Sheet: Fig. 4
		swarming			swarming		swimming			swimming
	CK	3	6.7	7.3	5.66667	1.33333	3.5	1.7	1.05	2.08333	0.708333
	Rl	2.4	2.2	5.3	3.3	1	3.6	3.35	5.85	4.26667	0.791667
	Root	3	2.1	1.5	2.2	0.4	2.5	0.9	0.9	1.43333	0.533333
	Rl+root	9	8.6	8.1	8.56667	0.233333	1	1.1	1.1	1.06667	0.0333333

## Sheet: Fig. 5
						CK					Rl					Root					Rl+root
		sfp	1	0.857	0.437	0.764667	0.163833	1.457	1.293		1.375	0.0546667	1.437	1.354		1.3955	0.0276667	0.536			0.536	0
		fliG	1	2.383	0.539	1.30733	0.537833	0.341	0.722	0.185	0.416	0.153	0.154	0.844	0.054	0.350667	0.246667	8.44	6.023		7.2315	0.805667
		CheR	1	0.593	0.21	0.601	0.1995	0.087	0.029	0.0485	0.0548333	0.0160833	0.155	0.03	0.003	0.0626667	0.0461667	0.012	0.012	0.011	0.0116667	0.000333333
		sfp							fliG
		Calculation result	Current Date 2022/1/29 9:58:30						Calculation result	Current Date 2022/1/29 10:01:09							CheR
		Treatment	Size of samples	Mean	Standard deviation	Standard Error	95%Confidence interval		Treatment	Size of samples	Mean	Standard deviation	Standard Error	95%Confidence interval			Calculation result	Current Date 2022/1/29 10:02:43
		A	3	0.7647	0.2926	0.169	0.0377	1.4916	A	3	1.3073	0.9596	0.5541	-1.0766	3.6912		Treatment	Size of samples	Mean	Standard deviation	Standard Error	95%Confidence interval
		B	3	1.375	0.082	0.0473	1.1713	1.5787	B	3	0.416	0.2762	0.1595	-0.2702	1.1022		A	3	0.601	0.3951	0.2281	-0.3804	1.5824
		C	3	1.3955	0.0415	0.024	1.2924	1.4986	C	3	0.3507	0.4302	0.2484	-0.7179	1.4192		B	3	0.0548	0.0295	0.017	-0.0185	0.1282
		D	3	0.536	0	0	0.536	0.536	D	3	7.2315	1.2085	0.6977	4.2294	10.2336		C	3	0.0627	0.0811	0.0468	-0.1388	0.2641
			Analysis of variance							Analysis of variance							D	3	0.0117	0.0006	0.0003	0.0102	0.0131
		Source of Variation	Sum of square	Degrees of freedom	Mean Square	F-value	p-value		Source of Variation	Sum of square	Degrees of freedom	Mean Square	F-value	p-value				Analysis of variance
		Treatments	1.6994	3	0.5665	24.083	0.0002		Treatments	97.955	3	32.6517	49.421	0			Source of Variation	Sum of square	Degrees of freedom	Mean Square	F-value	p-value
		Within Treatment	0.1882	8	0.0235				Within Treatment	5.2855	8	0.6607					Treatments	0.705	3	0.235	5.748	0.0214
		Total	1.8875	11					Total	103.24	11						Within Treatment	0.327	8	0.0409
																	Total	1.032	11
		LSD multiple comparison							LSD multiple comparison
		(Lower triangular are mean difference and statistics, upper triangular is p-value.)							(Lower triangular are mean difference and statistics, upper triangular is p-value.)								LSD multiple comparison
		LSD05=0.2888		LSD01=0.4202					LSD05=1.5304		LSD01=2.2269						(Lower triangular are mean difference and statistics, upper triangular is p-value.)
		No.	Mean	C	B	A	D		No.	Mean	D	A	B	C			LSD05=0.3807		LSD01=0.5539
		C	1.3955		0.874	0.001	0.0001		D	7.2315		0.0001	0.0001	0.0001			No.	Mean	A	C	B	D
		B	1.375	0.021(0.16)		0.0012	0.0002		A	1.3073	5.924(8.93)		0.2161	0.1874			A	0.601		0.0115	0.0107	0.0073
		A	0.7647	0.631(5.04)	0.610(4.87)		0.1053		B	0.416	6.815(10.27)	0.891(1.34)		0.924			C	0.0627	0.538(3.26)		0.9633	0.7653
		D	0.536	0.860(6.86)	0.839(6.70)	0.229(1.83)			C	0.3507	6.881(10.37)	0.957(1.44)	0.065(0.10)				B	0.0548	0.546(3.31)	0.008(0.05)		0.8003
		Alphabetic flag represent result							Alphabetic flag represent result								D	0.0117	0.589(3.57)	0.051(0.31)	0.043(0.26)
		Treatment	Mean	10% Significance level	5% Significance level	1% significant level			Treatment	Mean	10% Significance level	5% Significance level	1% significant level				Alphabetic flag represent result
		C	1.3955	a	a	A			D	7.2315	a	a	A				Treatment	Mean	10% Significance level	5% Significance level	1% significant level
		B	1.375	a	a	A			A	1.3073	b	b	B				A	0.601	a	a	A
		A	0.7647	b	b	B			B	0.416	b	b	B				C	0.0627	b	b	AB
		D	0.536	b	b	B			C	0.3507	b	b	B				B	0.0548	b	b	AB
																	D	0.0117	b	b	B
